# Supplementary material for: Intramolecular regulation of anillin during cytokinesis
Source: bioRxiv or medRxiv preprint supplement (doi:10.1101/726471), 2019-08-06
Supplement: Supplementary file [file media-2.pdf]

A

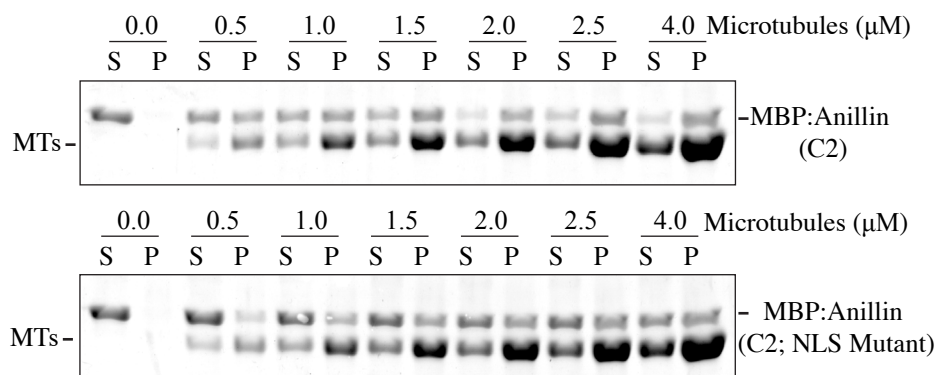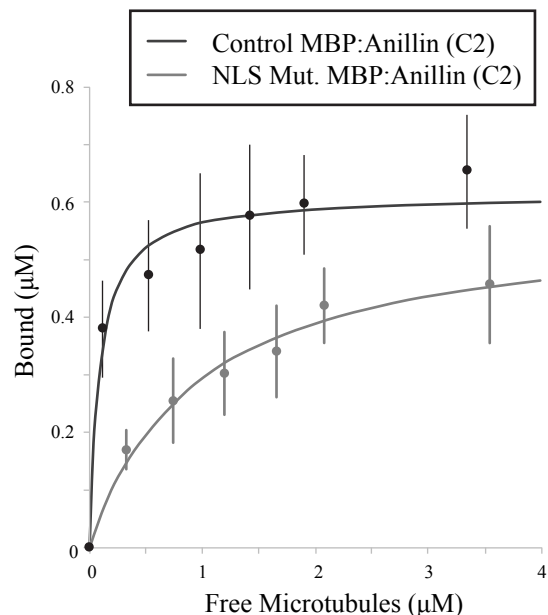

|                     | Control                      | NLS mutant                   |
|---------------------|------------------------------|------------------------------|
| <b>Binding Cap.</b> | $0.614 \pm 0.03 \mu\text{M}$ | $0.576 \pm 0.04 \mu\text{M}$ |
| <b>Kd</b>           | $0.089 \pm 0.03 \mu\text{M}$ | $0.96 \pm 0.18 \mu\text{M}$  |

B

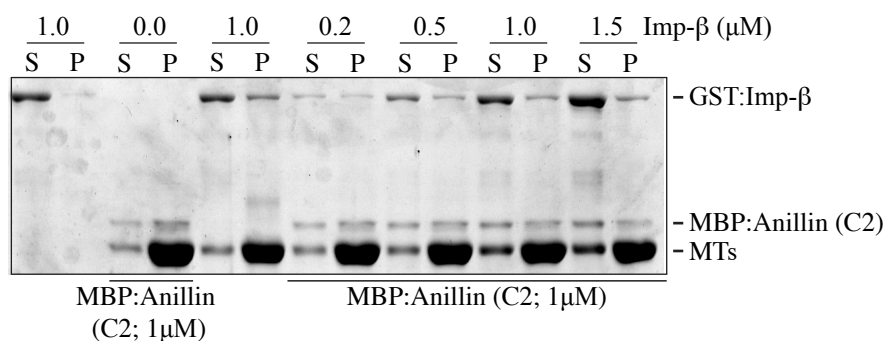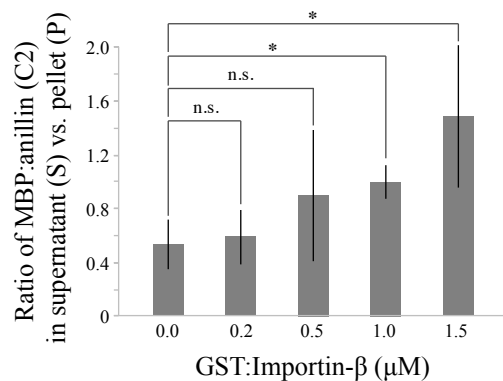

C

|                               |                       |                       |                               |
|-------------------------------|-----------------------|-----------------------|-------------------------------|
| Lysophosphatidic Acid (LPA)   | <input type="radio"/> | <input type="radio"/> | Sphingosine-1-phosphate (S1P) |
| Lysophosphocholine (LPC)      | <input type="radio"/> | <input type="radio"/> | PtdIns(3,4)P2                 |
| PtdIns (PI)                   | <input type="radio"/> | <input type="radio"/> | PtdIns(3,5)P2                 |
| PtdIns(3)P                    | <input type="radio"/> | <input type="radio"/> | PtdIns(4,5)P2                 |
| PtdIns(4)P                    | <input type="radio"/> | <input type="radio"/> | PtdIns(3,4,5)P3               |
| PtdIns(5)P                    | <input type="radio"/> | <input type="radio"/> | Phosphatidic Acid (PA)        |
| Phosphatidylethanolamine (PE) | <input type="radio"/> | <input type="radio"/> | Phosphatidylserine (PS)       |
| Phosphatidylcholine (PC)      | <input type="radio"/> | <input type="radio"/> | Blue Blank                    |

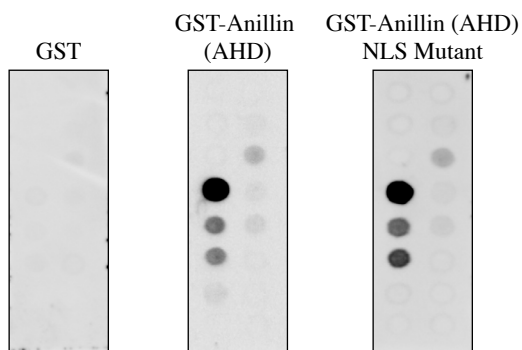

Figure S2
