# Supplementary material for: Intramolecular regulation of anillin during cytokinesis
Source: bioRxiv or medRxiv preprint supplement (doi:10.1101/726471), 2019-08-06
Supplement: Supplementary file [file media-3.pdf]

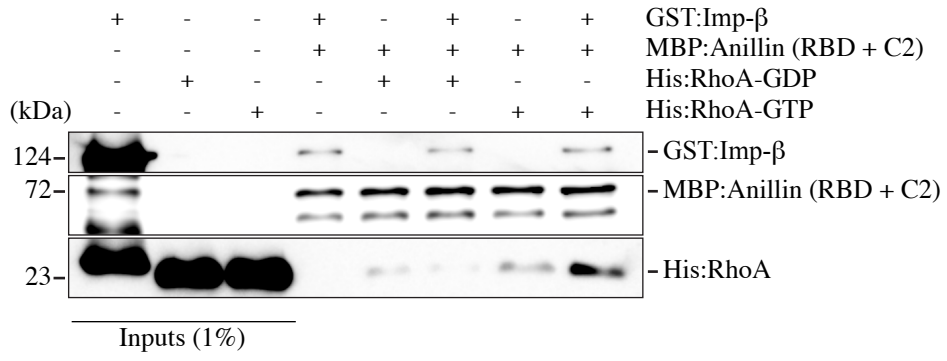

Figure S3
